# Supplementary material for: Fluorescent bracelet-like Cu@cross-linked poly(vinyl alcohol) (PVA) microrings by a hydrothermal process
Source: Royal Society of Chemistry journal article supplement (doi:10.1039/c1ra00227a), 2011-01-01
Supplement: c1ra00227a.pdf [file c1ra00227a.pdf]

Supplementary Information

## Fluorescent bracelet-like Cu@cross-linked poly (vinyl alcohol) (PVA) microrings by hydrothermal process

Feng-Jia Fan, Yong-Jie Zhan, Jian-Hua Zhu, Ji-Ming Song, Shu-Hong Yu\*

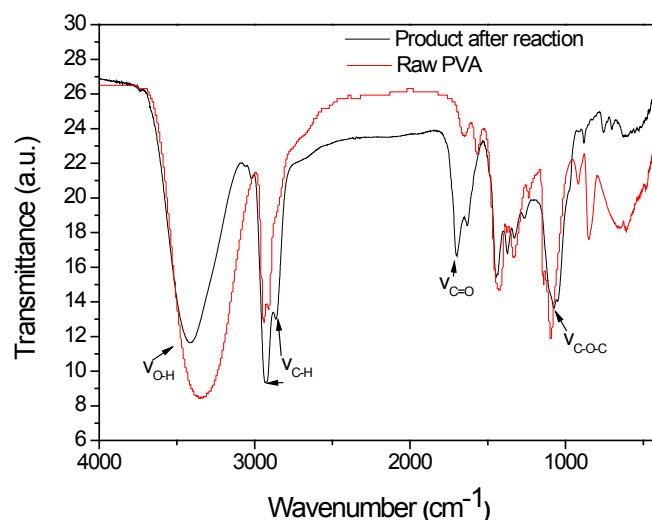

**Fig. S1** FTIR spectrum of the sample bracelet-like Cu@cross-linked microrings. A mixture of CuCl<sub>2</sub> and CuBr was reduced by PVA solution in the presence of a proper amount of NaBr at a temperature of 210 °C for 48 h.

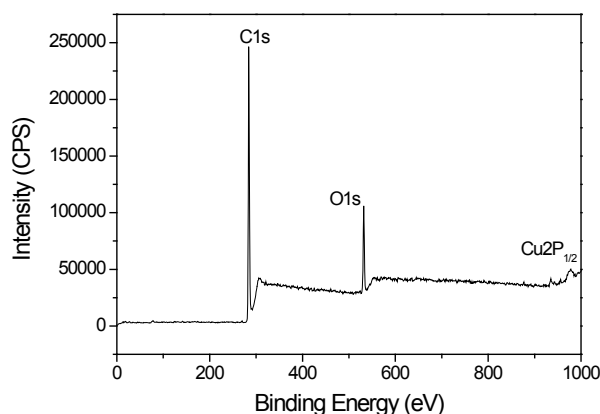

**Fig. S2** XPS spectrum of the bracelet-like Cu@cross-linked PVA microrings. A mixture of CuCl<sub>2</sub> and CuBr was reduced by PVA solution in the presence of a proper amount of NaBr at a temperature of 210 °C for 48 h.

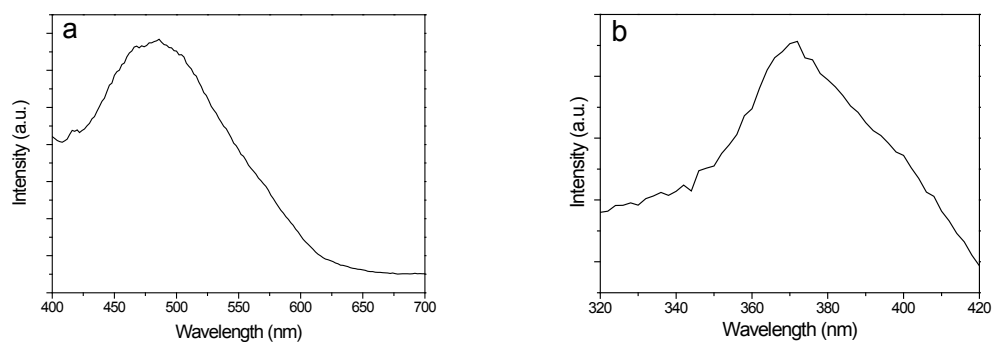

**Fig. S3** The room temperature PL spectra of the sample. A mixture of  $\text{CuCl}_2$  and  $\text{CuBr}$  was reduced by PVA solution in the presence of a proper amount of  $\text{NaBr}$  at a temperature of  $210\text{ }^\circ\text{C}$  for 48 h. (a) emission spectrum, the excitation wavelength is 360 nm. (b) excitation spectrum. The emission wavelength is 450 nm.

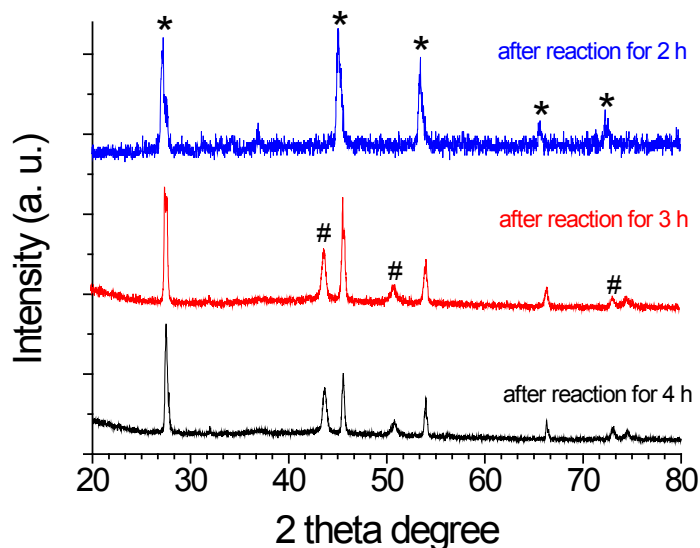

**Fig. S4** XRD pattern of the product prepared after different reaction time. # Cu phase, \* CuBr phase.
